# Supplementary material for: Synthesis of copper nanoparticles mediated by photogenerated free radicals: catalytic role of chloride anions
Source: Royal Society of Chemistry journal article supplement (doi:10.1039/b9pp00200f), 2010-04-10
Supplement: b9pp00200f.pdf [file b9pp00200f.pdf]

***Supporting Information for:***

**Synthesis of Copper Nanoparticles Mediated by Photogenerated Free Radicals: catalytic role of chloride anions**

Natalia L. Pacioni,<sup>a</sup> Andrea Pardoe,<sup>a</sup> Katherine L. McGilvray,<sup>a</sup> Michelle N. Chrétien<sup>b</sup>  
and Juan C. Scaiano<sup>a,\*</sup>

<sup>a</sup> *Centre for Catalysis Research and Innovation, Department of Chemistry, University of Ottawa, 10 Marie Curie, Ottawa, K1N 6N5, Canada. E-mail: tito@photo.chem.uottawa.ca*

<sup>b</sup> *Materials Synthesis & Characterization, Xerox Research Centre of Canada, Toronto, Canada.*

**Contents**

- A- Effect of chloride anions on the spectroscopy of Cu<sup>2+</sup>.
- B- Dependence of final absorption of CuNP with the initial copper concentration in the presence and absence of CTAB.
- C- Absorbance spectra of CuNP in acetonitrile with different concentrations of CTAC.
- D- SEM or TEM images of CuNP synthesized in water in the presence of stabilizers.
- E- SEM images of CuNP synthesized in acetonitrile with different I-907 concentration.

**A. Effect of chloride anions on the spectroscopy of  $\text{Cu}^{2+}$ .**

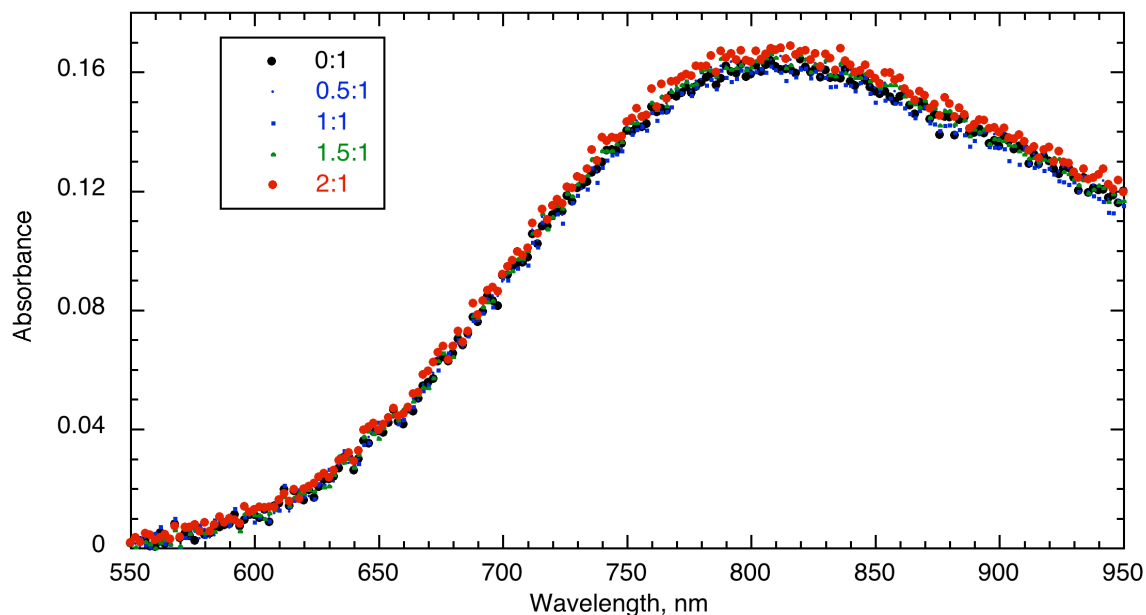

**Figure S1.** Effect of chloride addition (as NaCl) on the spectra of 10 mM aqueous  $\text{CuSO}_4$ . The numbers in the legend give the ratio of  $\text{Cl}^-$  to  $\text{Cu}^{2+}$ .

**B- Dependence of final absorption of CuNP with the initial copper concentration in the presence and absence of CTAB.**

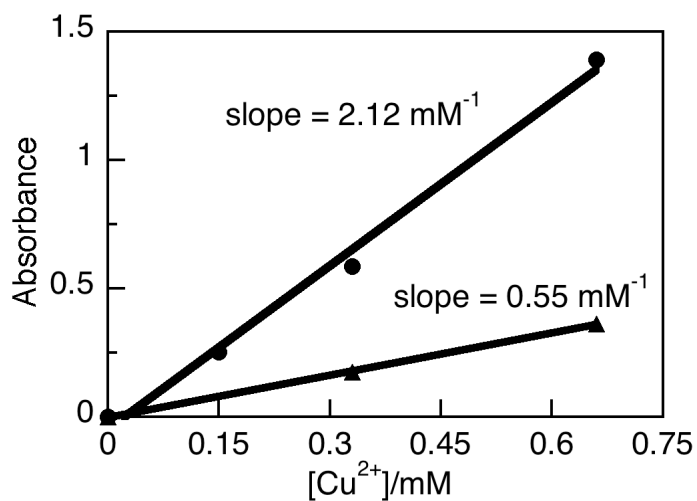

**Figure S2.** Dependence of the absorbance at the plasmon resonance band wavelength with the initial concentration of  $\text{Cu}^{2+}$ . (●) CTAB 0.33 mM; (▲) no stabilizer.

**C- Absorbance spectra of CuNP in acetonitrile with different concentration of CTAC.**

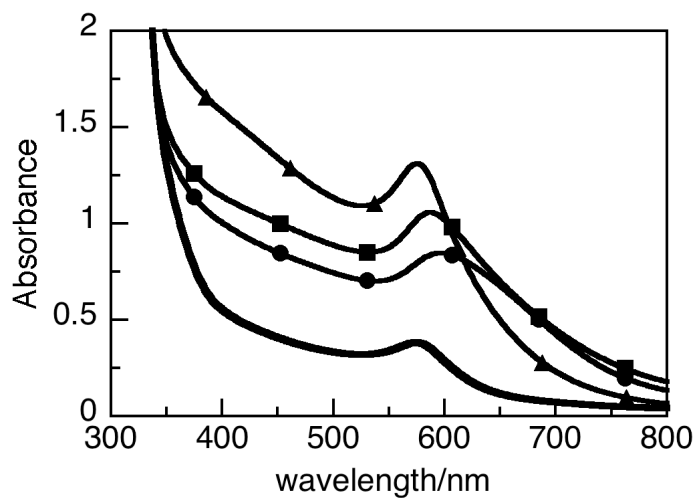

X

**Figure S3.** Absorbance spectra of CuNP synthesized in acetonitrile from 0.66 mM  $\text{Cu}(\text{OAc})_2$ , 1.32 mM I-907 and 0.15 mM (●), 0.33 mM (■), 0.66 mM (▲) or 0.99 mM (—) CTAC.

**D- SEM or TEM images of CuNP synthesized in water in the presence of stabilizers.**

Given the lack of stability of CuNP to air, the samples for TEM and SEM were prepared right after the synthesis without processing to avoid oxidation of the nanoparticles. As a result some of the images may show some organic matter.

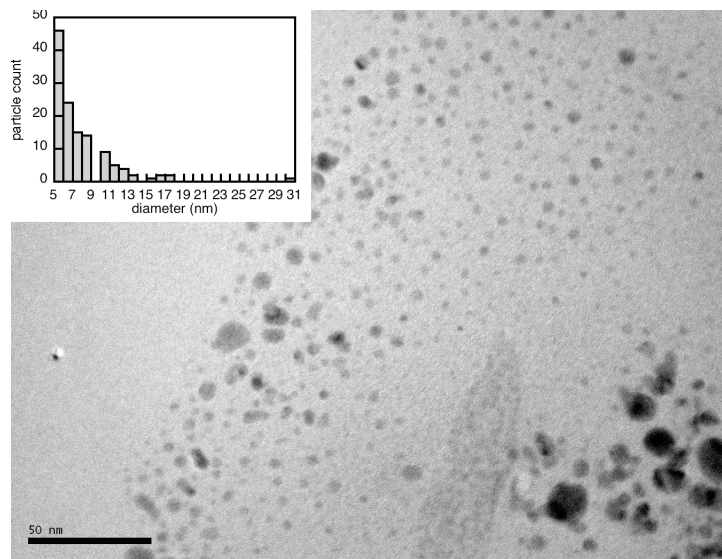

**Figure S4.** TEM image and histogram (inset) for CuNP synthesized in water in the presence of CTAC.

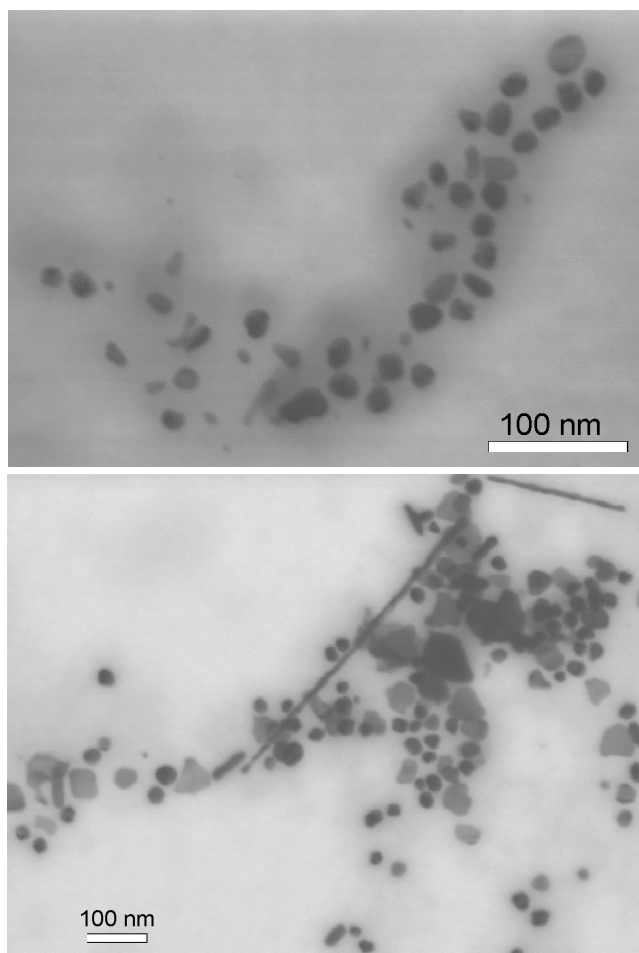

**Figure S5.** SEM images of CuNP synthesized in the presence of TMABr (top) and TPABr (bottom)

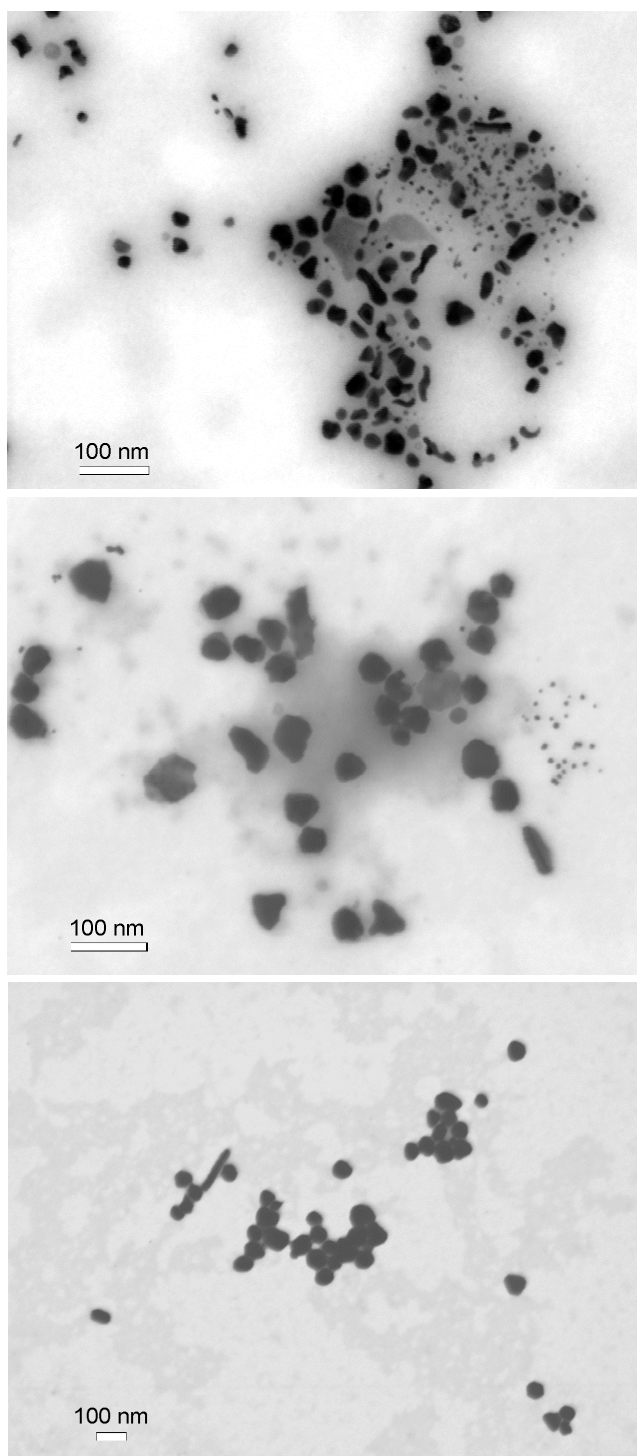

**Figure S6.** SEM images of CuNP synthesized in the presence of TMACl (top), TPACl (middle), TBACl (bottom).

**E- SEM images of CuNP synthesized in acetonitrile with different I-907 concentration.**

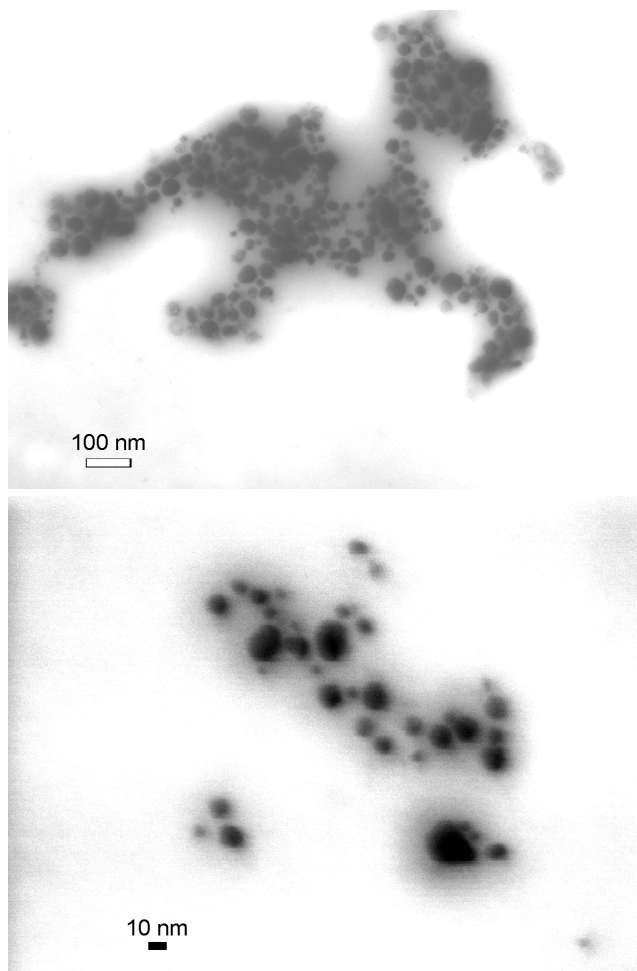

**Figure S7.** SEM images of CuNP synthesized in acetonitrile from 0.66 mM Cu(OAc)<sub>2</sub>, 0.66 mM CTAC and 1.32 mM (top) and 1.98 mM (bottom) I-907. Particle size: (Top) 40 nm (RSD: 17.5%); (bottom) 12 nm (RSD= 31%)
